# Supplementary material for: Solid-oxide Fe–air rechargeable battery using Fe–Ce(Mn, Fe)O2 for low temperature operation
Source: Royal Society of Chemistry journal article supplement (doi:10.1039/c5ta10675c), 2016-01-01
Supplement: c5ta10675c1.pdf [file c5ta10675c1.pdf]

## Solid-oxide Fe-air rechargeable battery using Fe-Ce(Mn,Fe)O<sub>2</sub> for low temperature operation

H. Kim<sup>a</sup>, A. Inoishi<sup>a</sup>, S. Ida<sup>a</sup>, and T. Ishihara<sup>a</sup>

### Schematic of the Fe-air rechargeable battery

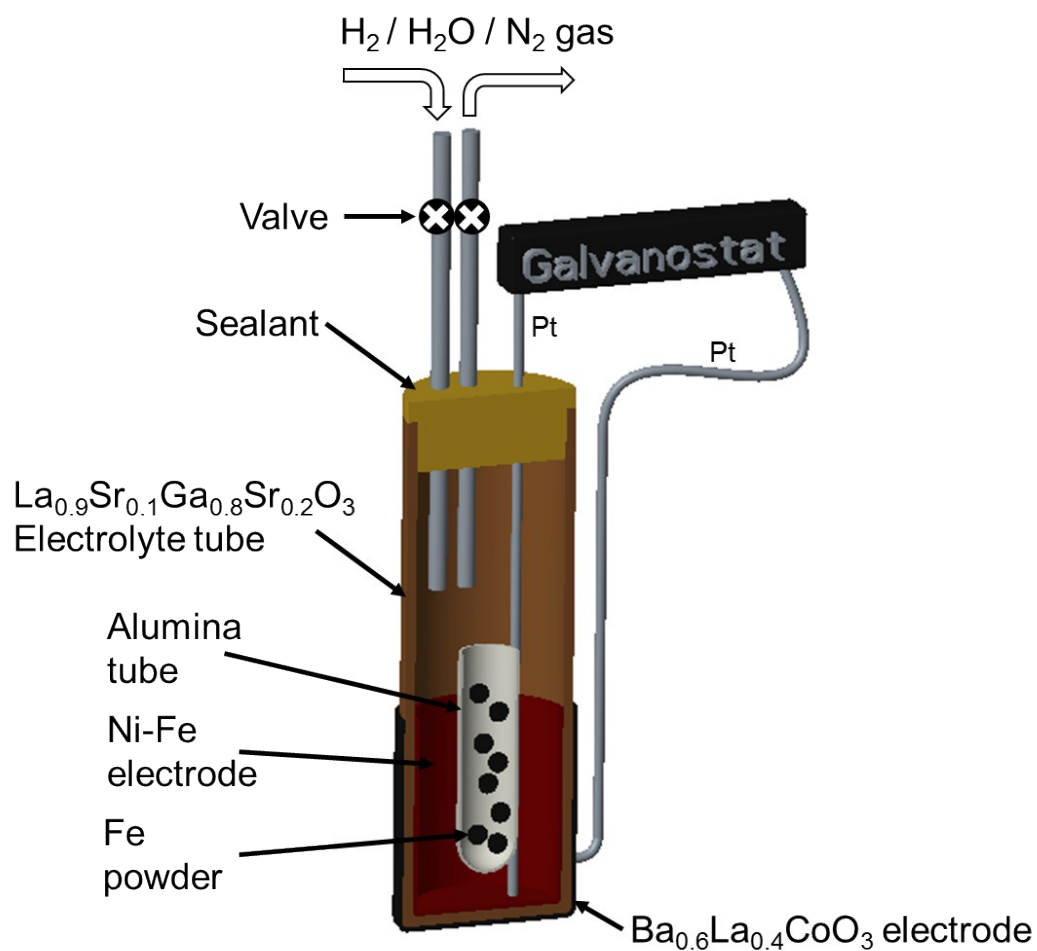

**Fig. S1** Schematic of the Fe-air rechargeable battery with tubular La<sub>0.9</sub>Sr<sub>0.1</sub>Ga<sub>0.8</sub>Mg<sub>0.2</sub>O<sub>3</sub> as the electrolyte.

### XRD patterns of Fe-5 wt% CMF after oxidation or reduction

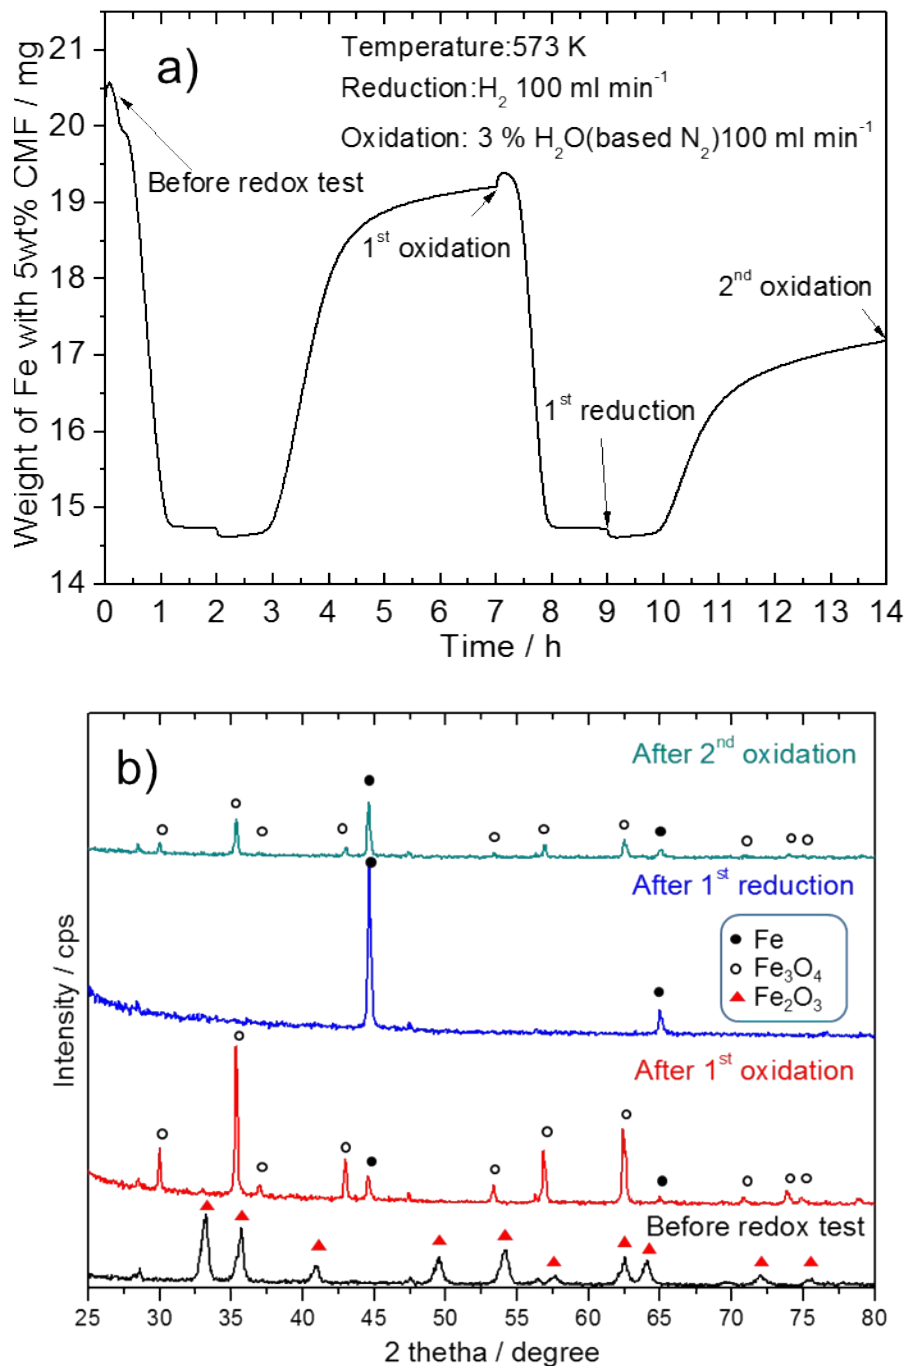

**Fig. S2** a) 2<sup>th</sup> redox cycle curves of Fe powder with 5 wt% CMF Catalyst at 573 K. b) XRD patterns of the Fe-5wt%CMF before redox cycles, after 1<sup>st</sup> oxidation, 1<sup>st</sup> reduction, 2<sup>nd</sup> oxidation.

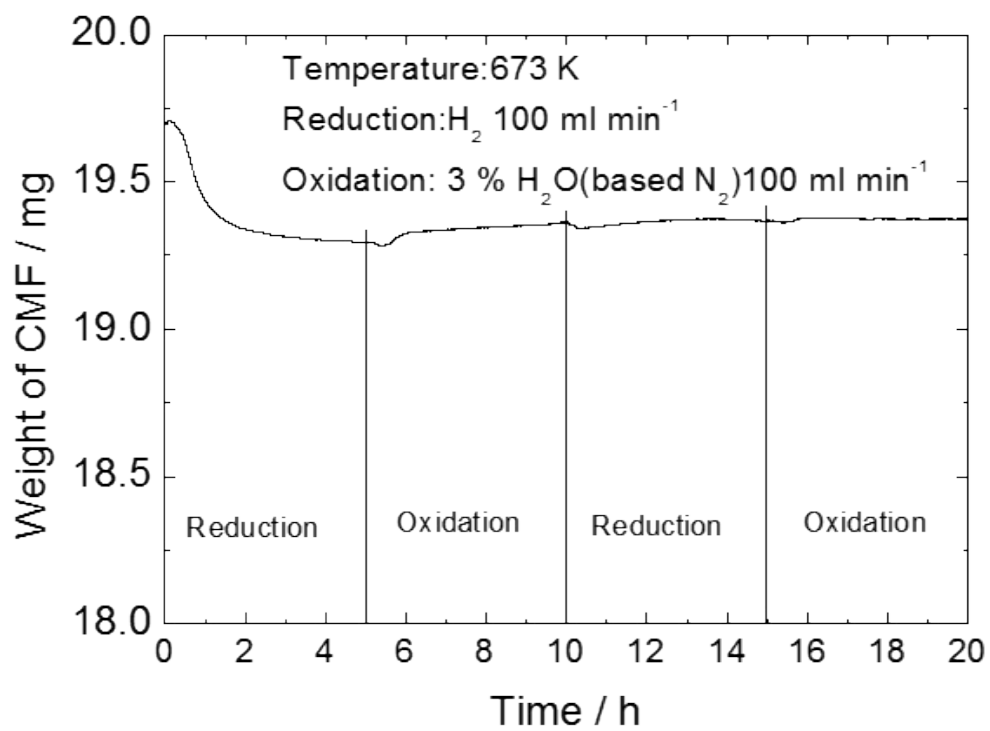

Fig. S3 Weight of CMF powder on redox behavior at 673 K.
